# Supplementary material
Source: Springer Nature journal article supplement (https://www.springermedizin.de/resource/supplementary/12891_2014_2223_MOESM1_ESM.pdf/9509710)
Supplement: MOESM1 [file 9509710]

Patient recruitment and  
baseline measurements  
RCT (n=144)

Intervention group 1  
(n=72)

Neck specific  
training including a cognitive  
behavioral approach

Intervention group 2  
(n=72)

Physical activity prescribed  
by a physiotherapist

Prospective follow-up at 3, 6, 12 & 24  
months after intervention baseline
